# Supplementary material for: Cathodic electrochemical determination of furfural in sugarcane bagasse using an electrode modified with nickel nanoparticles
Source: Royal Society of Chemistry journal article supplement (doi:10.1039/c6ay03222b), 2017-01-01
Supplement: c6ay03222b1.pdf [file c6ay03222b1.pdf]

### SUPPLEMENTARY INFORMATIONS

**Table S1.** Scan rate effect in the electrochemical parameters of  $1.0 \times 10^{-3}$  mol L<sup>-1</sup> furfural in LiOH 0,1 mol L<sup>-1</sup> on the surface of NiNPs/GCE by cyclic voltammetry.

| Scan rate / mV s <sup>-1</sup> | Furfural            |                      |                                      |
|--------------------------------|---------------------|----------------------|--------------------------------------|
|                                | E <sub>pc</sub> / V | I <sub>pc</sub> / μA | E <sub>p</sub> -E <sub>p/2</sub> (V) |
| 10                             | -1,35               | -7,41                | -0,047                               |
| 50                             | -1,40               | -14,6                | -0,058                               |
| 100                            | -1,41               | -21,3                | -0,058                               |
| 150                            | -1,41               | -26,0                | -0,058                               |
| 200                            | -1,42               | -29,3                | -0,062                               |
| 250                            | -1,42               | -33,1                | -0,058                               |
| 300                            | -1,43               | -34,3                | -0,061                               |
| 350                            | -1,43               | -35,7                | -0,062                               |
| 400                            | -1,43               | -38,9                | -0,060                               |
| 500                            | -1,44               | -43,9                | -0,063                               |
| 600                            | -1,44               | -48,2                | -0,063                               |

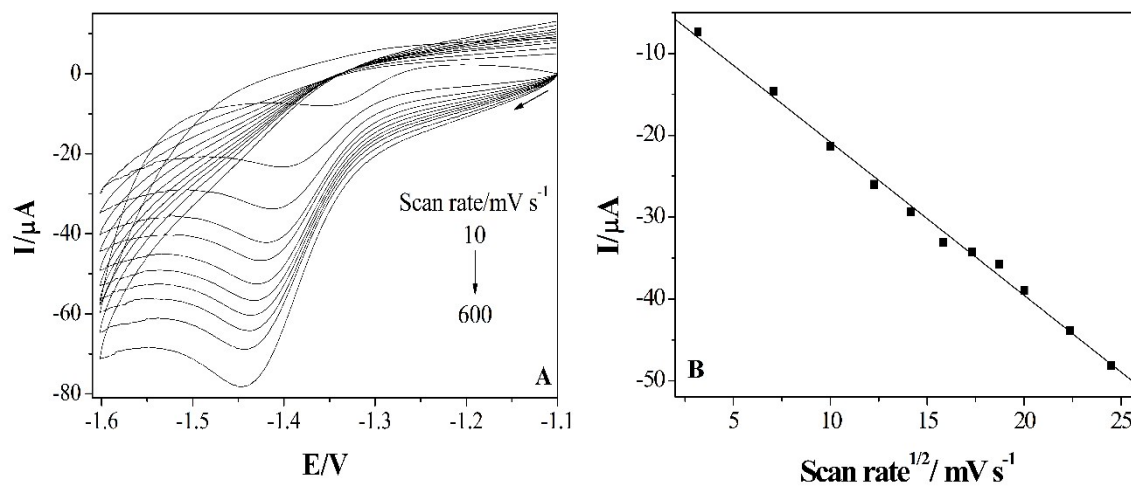

**Fig. S1.** Linear sweep voltammograms of  $1.0 \times 10^{-3} \text{ mol L}^{-1}$  furfural in  $0.1 \text{ mol L}^{-1}$  LiOH solution (A). Dependency of cathodic peak currents on the square root of the scan rate (B).

**Table S2.** Scan rate effect in the electrochemical parameters of  $1.0 \times 10^{-3}$  mol L<sup>-1</sup> furfural in LiOH 0,1 mol L<sup>-1</sup> on the surface of NiNPs/GCE by linear sweep voltammetry.

| Scan rate / mV s <sup>-1</sup> | Furfural            |                      |                  |                                      |
|--------------------------------|---------------------|----------------------|------------------|--------------------------------------|
|                                | E <sub>pc</sub> / V | I <sub>pc</sub> / μA | W <sub>1/2</sub> | E <sub>p</sub> -E <sub>p/2</sub> (V) |
| 10                             | -1,41               | -6,72                | 0,103            | -0,043                               |
| 50                             | -1,44               | -13,5                | 0,109            | -0,046                               |
| 100                            | -1,45               | -22,2                | 0,115            | -0,048                               |
| 150                            | -1,45               | -26,2                | 0,117            | -0,048                               |
| 200                            | -1,46               | -30,7                | 0,119            | -0,047                               |
| 250                            | -1,46               | -34,7                | 0,121            | -0,050                               |
| 300                            | -1,47               | -37,9                | 0,121            | -0,051                               |
| 350                            | -1,47               | -40,0                | 0,121            | -0,052                               |
| 400                            | -1,47               | -44,8                | 0,123            | -0,050                               |
| 450                            | -1,47               | -47,6                | 0,125            | -0,051                               |
| 500                            | -1,48               | -49,5                | 0,123            | -0,050                               |

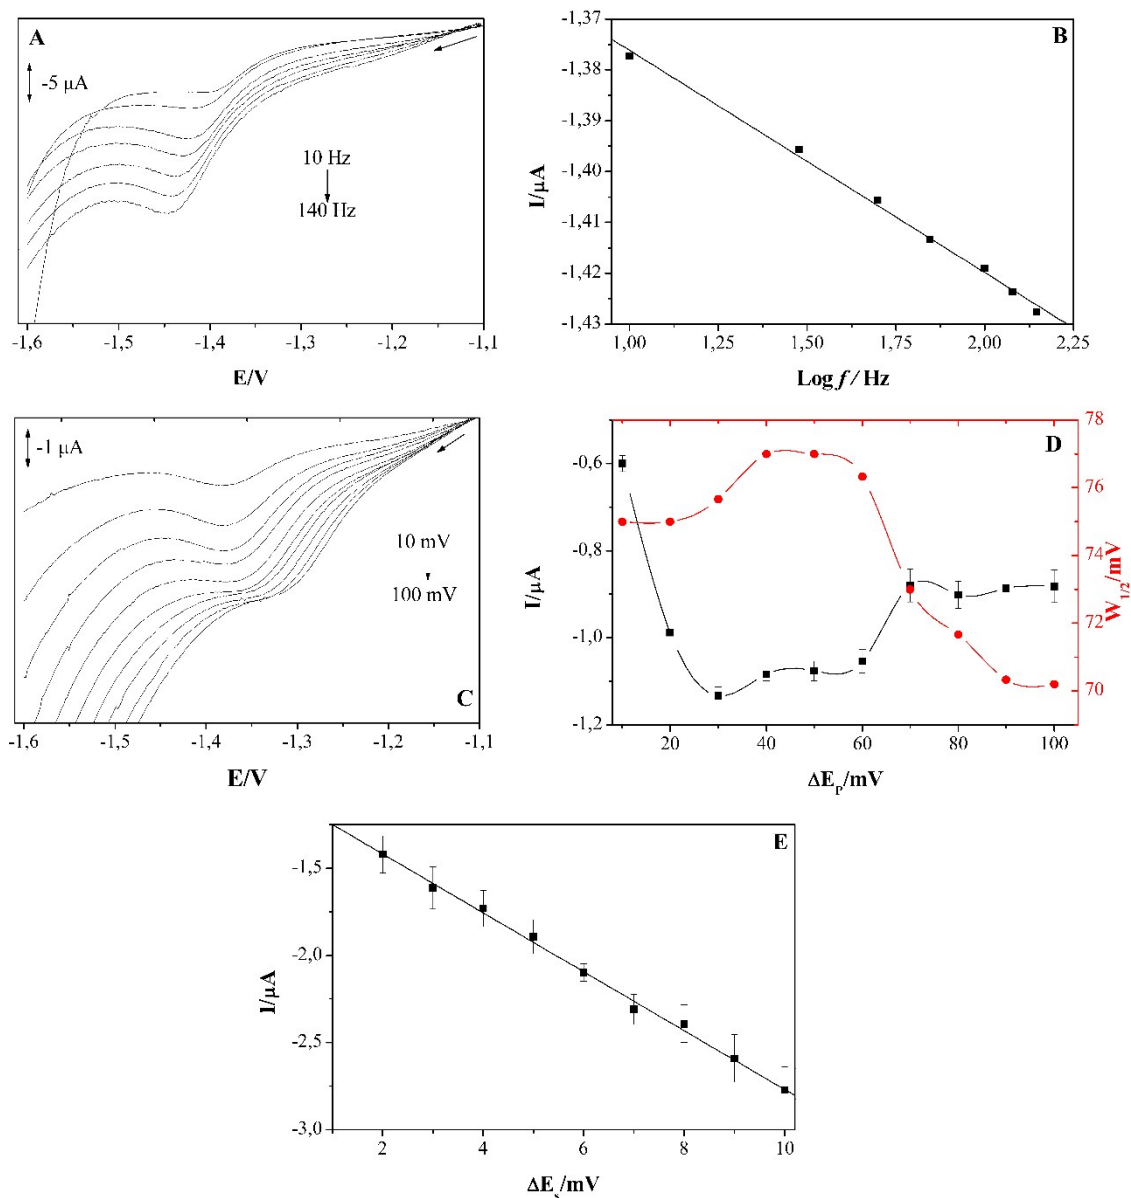

**Fig. S2.** (A) Square wave voltammograms of frequency ( $f$ ) study. (B) Effect of the logarithm of  $f$  ( $\log f$ ) on the current cathodic peak. (C) Voltammograms of the effect of pulse potential amplitude in the (D) current cathodic peak and width at half height. (E) Effect of potential scan increments in the current cathodic peak. Conditions: Furfural =  $2.0 \times 10^{-5} \text{ mol L}^{-1}$  in LiOH  $0.1 \text{ mol L}^{-1}$ ; A and B)  $\Delta E_p = 20 \text{ mV}$  and  $\Delta E_s = 2 \text{ mV}$ ; C and D)  $\Delta E_s = 2 \text{ mV}$  and  $f = 60 \text{ Hz}$ ; and E)  $f = 60 \text{ Hz}$  and  $\Delta E_p = 20 \text{ mV}$ .

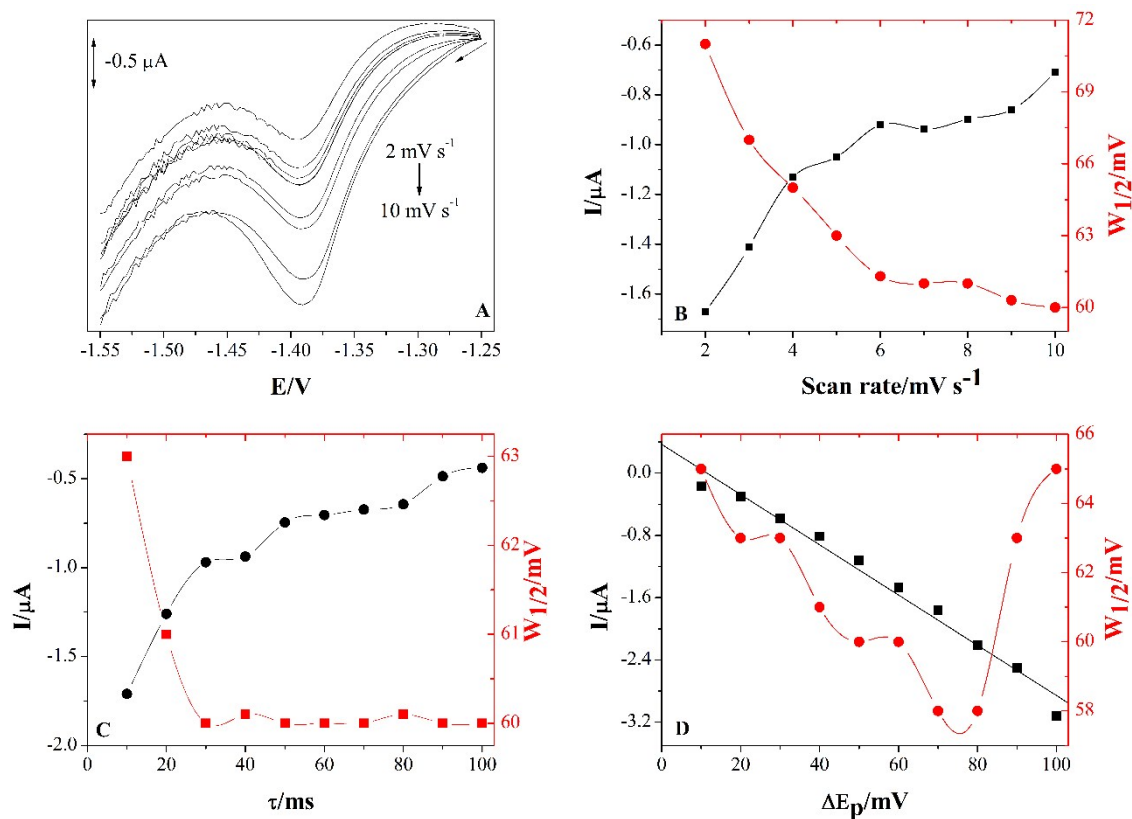

**Fig. S3.** Differential pulse voltammograms of scan rate study (A). Scan rate (B), pulse time (C) and pulse potential amplitude (D) effects on the current cathodic peak and width at half height. Conditions: Furfural =  $2.0 \times 10^{-5} \text{ mol L}^{-1}$  in LiOH  $0.1 \text{ mol L}^{-1}$ ; A and B)  $\tau = 50 \text{ ms}$  and  $\Delta E_p = 50 \text{ mV}$ ; C)  $v = 2 \text{ mV s}^{-1}$  and  $\Delta E_p = 50 \text{ mV}$ ; and D)  $v = 2 \text{ mV s}^{-1}$  and  $\tau = 40 \text{ ms}$ .
